# Supplementary material
Source: Springer Nature journal article supplement (https://www.springermedizin.de/resource/supplementary/12935_2010_247_MOESM1_ESM.pdf/9540138)
Supplement: MOESM1 [file 9540138]

**kaempferol**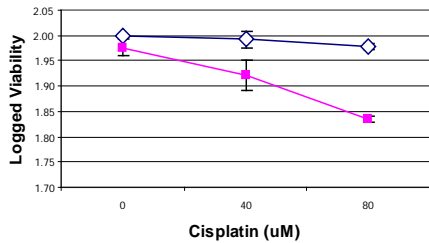 **$\alpha$ -Tocopherol Succinate**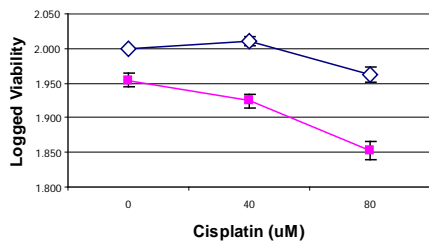**Rutin Hydrate**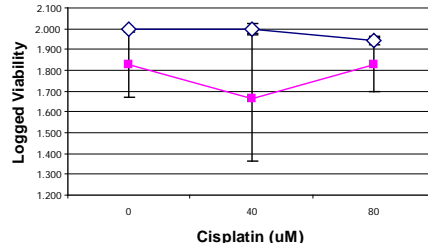**Apigenin**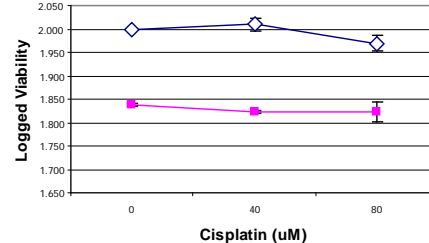**Taxifolin**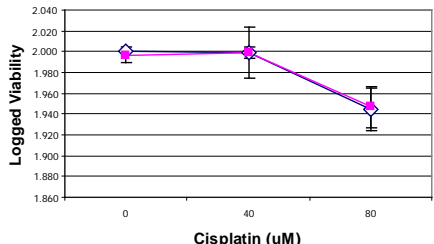**Luteolin**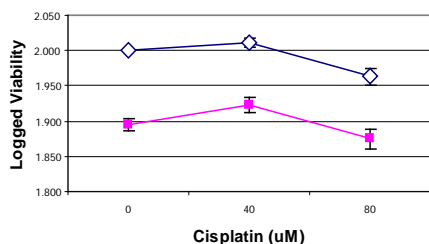**Naringin**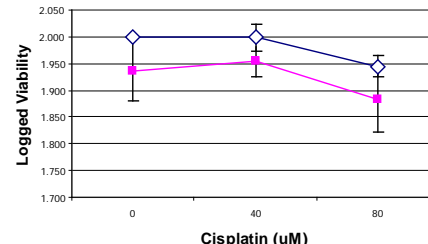 **$\alpha$ -Tocopherol**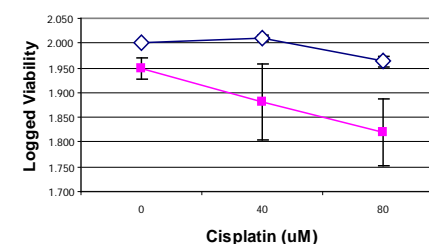**Genistein**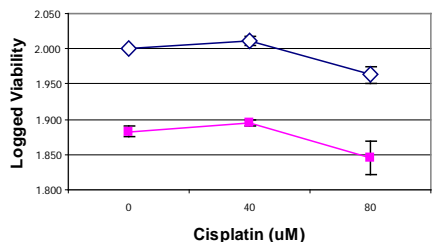**Quercetin**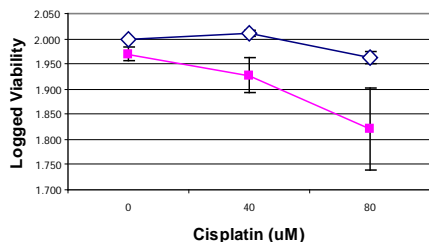

◇ DMSO

■ Test Chemical
